# Supplementary material for: Metabolomics study on southern hard clams (Mercenaria campechiensis) response to diclofenac exposure
Source: Royal Society of Chemistry journal article supplement (doi:10.1039/d2va00207h), 2022-11-07
Supplement: d2va00207h1.pdf [file d2va00207h1.pdf]

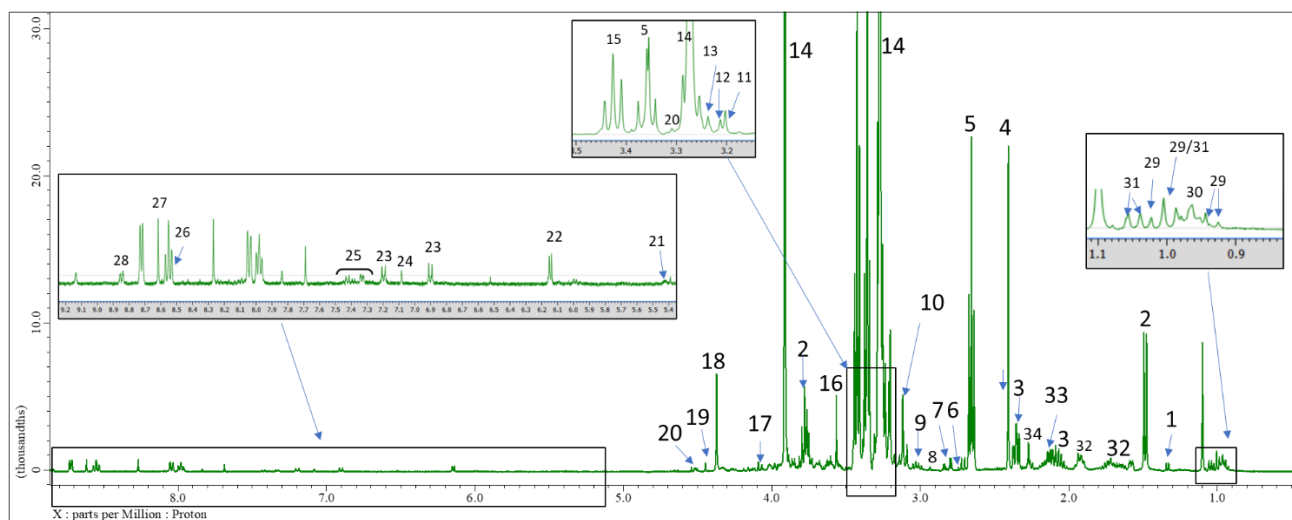

1  
2 **Figure S1** The metabolites identified in the NMR spectrum 1, Lactate; 2, Alanine; 3, Glutamate; 4,  
3 Succinate; 5, Hypotaurine, 6, Dimethylamine; 7, Aspartate; 8 N,N-Dimethylglycine; 9, Lysine; 10,  
4 Malonate; 11, Choline, 12 O-Phosphocholine; 13, sn-Glycero-3-phosphocholine, 14, Betaine; 15, Taurine;  
5 16, Glycine; 17, myo-Inositol; 18, Tartrate; 19, Trigonelline; 20, Glucose ; 21, Glycogen; 22, ATP/AMP;  
6 23, Tyrosine; 24, Histidine; 25, Phenylalanine; 26 AMP; 27, ATP; 28, Pyrimidine; 29, Isoleucine; 30,  
7 Leucine; 31, Valine; 32, D-Arginine; 33, Methionine; 34, Acetoacetate \*Unknown and overlap peaks are  
8 not noted in the spectrum.

9  
10
